# Supplementary material for: Arthrocnemum Moq.: Unlocking Opportunities for Biosaline Agriculture and Improved Human Nutrition
Source: MDPI journal article supplement (doi:10.3390/plants13040496), 2024-02-09
Supplement: s1 [file s1]

**Table S1.** Material of *A. macrostachyum* and *A. meridionale* analyzed by ICP-MS: stems (ST) and seeds (S); SEM microscopy (numbers indicate the number of images taken per sample); SEM-EDX (number of analyzes performed by Energy Dispersive X-ray coupled to SEM); TEM microscopy (numbers indicate the number of images taken per sample) and X-ray diffraction (XR).

| Taxa                    | Location                                                                                                   | ICP Stems | ICP Seeds | SEM | SEM-EDX      | TEM | XR |
|-------------------------|------------------------------------------------------------------------------------------------------------|-----------|-----------|-----|--------------|-----|----|
| <i>A. macrostachyum</i> | Spain, Huelva, Ayamonte, “Salón de Santa Gadea”, 18.07.2018, 29SPB4218, UAM                                | -         | -         | 14  | 20           | -   | -  |
| <i>A. macrostachyum</i> | Spain: Huelva, Tinto river marshes, Moguer, 06.05.2005, 29SPB9028, UAM                                     | ST1       | -         | -   | -            | -   | X  |
| <i>A. macrostachyum</i> | Spain: Huelva, Tinto river marshes, Moguer, 05.06.2005, 29SPB9028, UAM                                     | ST2       | -         | -   | -            | -   | -  |
| <i>A. macrostachyum</i> | Spain: Huelva, Tinto river marshes, San Juan del Puerto, 27.06.2006, 29SPB9230, UAM                        | ST3       | -         | 44  | 37 + Mapping | -   | -  |
| <i>A. macrostachyum</i> | Spain: Huelva, Tinto river marshes, San Juan del Puerto, 24.05.2006, 29SPB9230, UAM                        | -         | -         | 31  | 24           | -   | -  |
| <i>A. macrostachyum</i> | Spain: Huelva, Tinto river marshes, San Juan del Puerto, 07.08.2019, 29SPB9131, UAM                        | ST4       | -         | -   | -            | -   | -  |
| <i>A. macrostachyum</i> | Spain: Huelva, Tinto river marshes, Moguer, 27.09.2005, 29SPB9028, UAM                                     | ST5       | -         | -   | -            | -   | -  |
| <i>A. macrostachyum</i> | Spain: Huelva, Tinto river marshes, La Rábida, 27.06.2006, 29SPB8320, UAM                                  | ST6       | -         | -   | -            | -   | -  |
| <i>A. macrostachyum</i> | Spain: Huelva, Tinto river marshes, La Rábida, 17.07.2018, 29SPB8320, UAM                                  | ST7       | S2        | 14  | 15           | -   | -  |
| <i>A. macrostachyum</i> | Spain: Huelva, Tinto river marshes, La Rábida, 17.07.2018, 29SPB8320, UAM                                  | ST8       | -         | -   | -            | 36  | -  |
| <i>A. macrostachyum</i> | Spain: Huelva, Tinto river marshes, La Rábida, 14.12.2017, 29SPB8320, UAM                                  | -         | -         | 17  | 3            | 113 | -  |
| <i>A. macrostachyum</i> | Spain: Huelva, Tinto river marshes, estuary, 17.07.2018, 29SPB8220, UAM                                    | ST9       | S1        | -   | -            | 77  | X  |
| <i>A. macrostachyum</i> | Spain: Huelva, Tinto river marshes, estuary, 27.06.2006, 29SPB8220, UAM                                    | ST10      | -         | -   | -            | -   | X  |
| <i>A. macrostachyum</i> | Spain: Huelva, Tinto river marshes, estuary, 17.07.2018, 29SPB8220, UAM                                    | ST11      | -         | -   | -            | -   | -  |
| <i>A. macrostachyum</i> | Spain: Toledo, Villasequilla de Yepes, 03.03.2019, 30SVK3520, UAM                                          | ST12      | -         | -   | -            | -   | -  |
| <i>A. macrostachyum</i> | Spain: Toledo, Villasequilla de Yepes, 26.05.2009, 30SVK3814, MAF178626                                    | -         | -         | 26  | 25           | -   | -  |
| <i>A. macrostachyum</i> | Spain: Toledo, Lillo, Laguna de Longar, 26.05.2009, 30SVJ7294, MAF178627                                   | ST13      | -         | -   | -            | -   | -  |
| <i>A. macrostachyum</i> | Spain: Alicante, Urbanova, N-332, km 98, 07-10-2021, 30SYH1641, UAM                                        | ST14      | -         | -   | -            | -   | -  |
| <i>A. macrostachyum</i> | Spain: Alicante, Calpe, Laguna de Ifach, 28.08.2015, 31SBC4579, MAF181282                                  | ST15      | -         | -   | -            | -   | -  |
| <i>A. macrostachyum</i> | Spain: Murcia, San Pedro del Pinatar, Cotorillo marshes, 22.09.2009, 30SXG9692, MAF178628                  | ST16      | -         | -   | -            | -   | -  |
| <i>A. macrostachyum</i> | Spain: Castellón, Torreblanca, Parque Natural Cabanes, 28.09.2009, 31TBE6454, MAF178634                    | ST17      | -         | 6   | 23           | -   | -  |
| <i>A. macrostachyum</i> | Spain: Albacete, Cordovilla, Fuente García, 07.02.2019, 30SXH2166, MAF181294                               | -         | S3        | 15  | 12           | -   | -  |
| <i>A. macrostachyum</i> | Spain: Huelva, Tinto river marshes, estuary, 14.12.2017, 29SPB8220, UAM                                    | -         | S4        | -   | -            | -   | -  |
| <i>A. macrostachyum</i> | Spain: Huelva, Tinto river marshes, La Rábida, 15.12.2017, 29SPB8320, UAM                                  | -         | S5        | -   | -            | -   | -  |
| <i>A. macrostachyum</i> | Spain: Alicante, Santa Pola, salinas del Bras del Port, 02.09.2008, 30SYH0827, MAF178625                   | -         | -         | 16  | 16           | -   | -  |
| <i>A. macrostachyum</i> | Spain: Zaragoza, Belchite, El Planerón, 19.01.2017, 30TXL9782, MAF178638                                   | -         | -         | 2   | 5            | -   | -  |
| <i>A. macrostachyum</i> | Spain: Islas Canarias, Fuerteventura, La Oliva, isla de Lobos, faro, 19.07.2022, 28RFS1582, UAM            | -         | -         | 16  | 16           | -   | -  |
| <i>A. macrostachyum</i> | Spain: Islas Canarias, Lanzarote, Haría, Órzola, playa del Caletón Blanco, 21.07.2022, 28RFT5133, UAM      | -         | -         | 3   | 3            | -   | -  |
| <i>A. meridionale</i>   | Tunisia: Gobernación de Tozeur, Chott el Djerid, end of the lake, km 19 Tozeur, 08.12.2019, 32SMC3561, UAM | ST18      | -         | -   | -            | -   | -  |
| <i>A. meridionale</i>   | Tunisia: Gobernación de Sfax, Sidi Mansour, cerca de Khalij, 03.12.2019, 32SPD6549, UAM                    | ST19      | -         | -   | -            | -   | -  |
| <i>A. meridionale</i>   | Malta: San Pawl il-Baħa, Salina Nature Reserve, on rocky ground, 16.08.2020, 33SVV4878, MAF178645          | ST20      | -         | -   | -            | -   | -  |
| <i>A. meridionale</i>   | Tunisia: Sfax, Kerkennah Island, Chergui, Kraten marshes, 17.10.2019, 32SQD0554, MAF180599                 | -         | S6        | -   | -            | -   | -  |

|                       |                                                                                                                    |   |    |    |    |   |   |
|-----------------------|--------------------------------------------------------------------------------------------------------------------|---|----|----|----|---|---|
| <i>A. meridionale</i> | Tunisia: Gobernación de Sfax, Sidi Mansour, cerca de Khalij, 03.12.2019, 32SPD6549, UAM                            | - | -  | 33 | 33 | - | - |
| <i>A. meridionale</i> | Italy: Sardinia, Isle Sant'Antioco, Is Pruinis-Playa, 29.11.2012, 32SMJ5321, MAF178642                             | - | S7 | -  | -  | - | - |
| <i>A. meridionale</i> | Italy: Sicily, Siracusa, Riserva Naturale Orientata Oasi Faunistica di Vendicari, 16.06.2017, 33SWA0974, MAF178639 | - | -  | 16 | -  | - | - |
| <i>A. meridionale</i> | Italy, Sicily, Saline di Trapani e Paceco nature reserve, 30STC8207, 14.06.2017, MAF178641                         | - | -  | 16 | 3  | - | - |
| <i>A. meridionale</i> | Italy: Sicily, Palermo, Cinisi, Cinisi beach, 15.06.2017, 33SUC3225, MAF178640                                     | - | -  | 32 | -  | - | - |

**Table S2.** ICP-MS (ppm) of succulent stems of *A. macrostachyum* (triplicates). Symbology: M (mean) and SD (Standard deviation). Samples nomenclature referred in Table S1.

| ID        | Na        | Mg      | K        | Ca      | Fe     | Zn    | B     | Mn    | Mo   | Cu    | Ni    | Ba   | Sr    | Cr    | As   | Cd   | Pb   |
|-----------|-----------|---------|----------|---------|--------|-------|-------|-------|------|-------|-------|------|-------|-------|------|------|------|
| ST1       | 86994.19  | 5924.84 | 22502.63 | 2888.35 | 238.07 | 19.30 | 23.64 | 18.49 | 1.01 | 10.13 | 7.18  | 2.24 | 13.47 | 13.88 | 1.90 | 0.19 | 0.84 |
| ST1       | 88961.74  | 6461.97 | 24953.92 | 3003.03 | 241.76 | 19.21 | 22.86 | 19.24 | 0.94 | 9.59  | 6.37  | 2.00 | 13.81 | 14.22 | 0.71 | 0.12 | 0.68 |
| ST1       | 97794.25  | 6473.98 | 23039.47 | 3117.51 | 263.53 | 18.91 | 22.95 | 19.10 | 0.98 | 10.26 | 7.29  | 2.40 | 13.58 | 15.79 | 0.56 | 0.13 | 0.82 |
| <b>M</b>  | 91250.06  | 6286.93 | 23498.67 | 3002.96 | 247.79 | 19.14 | 23.15 | 18.94 | 0.98 | 9.99  | 6.95  | 2.22 | 13.62 | 14.63 | 1.06 | 0.15 | 0.78 |
| <b>SD</b> | 5752.19   | 313.64  | 1288.54  | 114.58  | 13.76  | 0.20  | 0.43  | 0.40  | 0.04 | 0.35  | 0.50  | 0.20 | 0.17  | 1.02  | 0.73 | 0.04 | 0.09 |
| ST2       | 121200.72 | 7394.56 | 33618.73 | 5276.00 | 78.62  | 36.64 | 29.57 | 8.25  | 1.31 | 6.31  | 0.88  | 0.80 | 38.84 | 7.03  | 0.00 | 0.20 | 0.26 |
| ST2       | 126808.56 | 7150.62 | 33520.42 | 5358.40 | 81.47  | 34.71 | 32.32 | 8.08  | 1.29 | 5.85  | 0.96  | 0.80 | 38.25 | 7.14  | 0.00 | 0.21 | 0.23 |
| ST2       | 112489.63 | 6720.59 | 34014.14 | 4963.94 | 73.25  | 34.32 | 35.59 | 7.36  | 1.26 | 5.62  | 0.76  | 0.73 | 36.20 | 6.55  | 0.00 | 0.18 | 0.23 |
| <b>M</b>  | 120166.30 | 7088.59 | 33717.76 | 5199.45 | 77.78  | 35.22 | 32.50 | 7.89  | 1.29 | 5.92  | 0.87  | 0.77 | 37.76 | 6.90  | 0.00 | 0.20 | 0.24 |
| <b>SD</b> | 7215.29   | 341.24  | 261.33   | 208.07  | 4.18   | 1.24  | 3.01  | 0.47  | 0.03 | 0.35  | 0.10  | 0.04 | 1.39  | 0.31  | 0.00 | 0.02 | 0.02 |
| ST3       | 53611.25  | 9125.04 | 15568.71 | 8108.88 | 427.50 | 28.80 | 63.83 | 13.38 | 0.67 | 28.28 | 3.39  | 3.99 | 65.88 | 6.67  | 2.23 | 0.29 | 3.27 |
| ST3       | 69931.72  | 8492.80 | 14950.45 | 7372.24 | 424.30 | 25.11 | 57.13 | 12.50 | 0.45 | 26.56 | 3.60  | 4.13 | 59.35 | 7.05  | 2.12 | 0.36 | 3.06 |
| ST3       | 75558.20  | 9509.43 | 15072.37 | 8833.26 | 495.88 | 28.92 | 63.97 | 14.24 | 0.54 | 30.97 | 4.46  | 4.87 | 68.36 | 8.32  | 2.50 | 0.38 | 3.31 |
| <b>M</b>  | 66367.06  | 9042.43 | 15197.18 | 8104.79 | 449.23 | 27.61 | 61.64 | 13.37 | 0.55 | 28.61 | 3.82  | 4.33 | 64.53 | 7.35  | 2.29 | 0.34 | 3.21 |
| <b>SD</b> | 11399.44  | 513.33  | 327.48   | 730.52  | 40.43  | 2.17  | 3.91  | 0.87  | 0.11 | 2.22  | 0.57  | 0.47 | 4.65  | 0.86  | 0.19 | 0.05 | 0.13 |
| ST4       | 121620.37 | 6438.00 | 26553.07 | 6451.28 | 250.28 | 17.59 | 31.75 | 24.17 | 0.98 | 11.97 | 0.47  | 4.22 | 24.13 | 1.23  | 1.34 | 0.44 | 2.39 |
| ST4       | 121664.44 | 6297.30 | 28085.13 | 6451.07 | 246.51 | 15.92 | 34.07 | 24.40 | 1.06 | 12.68 | 0.23  | 4.93 | 25.05 | 0.44  | 1.27 | 0.39 | 2.36 |
| ST4       | 125620.13 | 6249.79 | 26671.75 | 6691.78 | 233.47 | 15.16 | 35.12 | 23.83 | 0.96 | 11.18 | 0.40  | 5.42 | 22.89 | 0.51  | 1.22 | 0.38 | 2.31 |
| <b>M</b>  | 122968.31 | 6328.36 | 27103.31 | 6531.38 | 243.42 | 16.22 | 33.65 | 24.13 | 1.00 | 11.94 | 0.37  | 4.86 | 24.02 | 0.73  | 1.28 | 0.40 | 2.35 |
| <b>SD</b> | 2296.64   | 97.88   | 852.34   | 138.91  | 8.82   | 1.24  | 1.73  | 0.28  | 0.05 | 0.75  | 0.12  | 0.60 | 1.08  | 0.44  | 0.06 | 0.03 | 0.04 |
| ST5       | 117867.17 | 7729.87 | 5387.12  | 7819.29 | 704.18 | 37.04 | 44.64 | 20.82 | 1.39 | 33.73 | 15.32 | 8.39 | 26.12 | 29.56 | 3.95 | 1.85 | 8.18 |
| ST5       | 101109.56 | 7489.71 | 7116.72  | 8156.53 | 567.32 | 34.44 | 50.62 | 17.83 | 1.49 | 33.59 | 11.94 | 8.23 | 28.41 | 21.90 | 2.82 | 1.43 | 5.95 |
| ST5       | 123497.48 | 8032.30 | 5947.78  | 8513.12 | 740.46 | 40.53 | 48.58 | 22.48 | 1.51 | 36.58 | 16.87 | 9.65 | 28.27 | 32.45 | 4.01 | 1.67 | 8.63 |
| <b>M</b>  | 114158.07 | 7750.63 | 6150.54  | 8162.98 | 670.65 | 37.34 | 47.95 | 20.38 | 1.46 | 34.64 | 14.71 | 8.76 | 27.60 | 27.97 | 3.59 | 1.65 | 7.59 |
| <b>SD</b> | 11645.72  | 271.89  | 882.45   | 346.96  | 91.31  | 3.05  | 3.04  | 2.36  | 0.06 | 1.69  | 2.52  | 0.78 | 1.28  | 5.45  | 0.67 | 0.21 | 1.43 |
| ST6       | 69261.02  | 8409.76 | 23723.88 | 3854.36 | 292.03 | 33.48 | 49.36 | 10.60 | 2.33 | 49.10 | 3.10  | 3.52 | 49.22 | 5.31  | 0.96 | 0.12 | 2.08 |
| ST6       | 78578.09  | 4748.03 | 13620.92 | 2491.51 | 169.35 | 19.61 | 28.58 | 6.08  | 1.48 | 29.23 | 0.06  | 2.30 | 29.08 | 2.75  | 0.35 | 0.04 | 1.32 |
| ST6       | 85484.19  | 4988.73 | 12619.41 | 2307.09 | 166.48 | 19.46 | 27.26 | 6.06  | 1.46 | 28.20 | 0.11  | 2.15 | 27.32 | 2.95  | 0.29 | 0.03 | 1.40 |
| <b>M</b>  | 77774.43  | 6048.84 | 16654.74 | 2884.32 | 209.29 | 24.18 | 35.07 | 7.58  | 1.76 | 35.51 | 1.09  | 2.66 | 35.21 | 3.67  | 0.53 | 0.06 | 1.60 |
| <b>SD</b> | 8141.39   | 2048.15 | 6142.50  | 845.12  | 71.67  | 8.05  | 12.40 | 2.62  | 0.50 | 11.78 | 1.74  | 0.75 | 12.17 | 1.42  | 0.37 | 0.05 | 0.42 |

| ID   | Na        | Mg       | K        | Ca       | Fe      | Zn     | B      | Mn     | Mo    | Cu    | Ni    | Ba    | Sr     | Cr    | As    | Cd   | Pb    |
|------|-----------|----------|----------|----------|---------|--------|--------|--------|-------|-------|-------|-------|--------|-------|-------|------|-------|
| ST7  | 58893.94  | 6139.17  | 10825.83 | 3452.88  | 334.80  | 18.90  | 44.45  | 74.49  | 1.38  | 53.44 | 4.51  | 2.88  | 39.34  | 9.66  | 0.95  | 0.08 | 3.73  |
| ST7  | 53658.07  | 5564.07  | 9432.96  | 3287.33  | 291.02  | 18.60  | 49.66  | 68.51  | 1.23  | 49.58 | 4.32  | 2.47  | 36.09  | 8.39  | 1.20  | 0.08 | 3.21  |
| ST7  | 61717.03  | 6390.67  | 10795.30 | 3636.69  | 325.27  | 20.34  | 43.83  | 78.04  | 1.38  | 55.55 | 4.88  | 2.93  | 41.47  | 9.77  | 1.10  | 0.08 | 3.45  |
| M    | 58089.68  | 6031.30  | 10351.36 | 3458.96  | 317.03  | 19.28  | 45.98  | 73.68  | 1.33  | 52.85 | 4.57  | 2.76  | 38.97  | 9.27  | 1.09  | 0.08 | 3.46  |
| SD   | 4089.23   | 423.72   | 795.50   | 174.76   | 23.03   | 0.93   | 3.20   | 4.82   | 0.09  | 3.02  | 0.29  | 0.25  | 2.71   | 0.77  | 0.13  | 0.00 | 0.26  |
| ST8  | 49850.49  | 6684.52  | 13706.84 | 4610.99  | 276.33  | 26.86  | 37.77  | 25.35  | 1.51  | 53.03 | 2.98  | 2.58  | 30.95  | 4.86  | 0.81  | 0.14 | 2.95  |
| ST8  | 60233.28  | 6087.81  | 10357.00 | 4143.72  | 272.79  | 22.90  | 38.05  | 22.56  | 1.64  | 49.86 | 2.45  | 2.37  | 25.57  | 4.41  | 0.00  | 0.00 | 3.81  |
| ST8  | 63159.70  | 6304.62  | 11735.53 | 4286.17  | 251.67  | 20.12  | 34.96  | 22.39  | 1.80  | 47.16 | 2.17  | 2.66  | 28.40  | 3.52  | 0.00  | 0.00 | 3.80  |
| M    | 57747.82  | 6358.98  | 11933.12 | 4346.96  | 266.93  | 23.29  | 36.93  | 23.44  | 1.65  | 50.01 | 2.53  | 2.54  | 28.31  | 4.26  | 0.27  | 0.05 | 3.52  |
| SD   | 6994.06   | 302.04   | 1683.64  | 239.50   | 13.33   | 3.39   | 1.71   | 1.66   | 0.15  | 2.94  | 0.41  | 0.15  | 2.69   | 0.68  | 0.47  | 0.08 | 0.50  |
| ST9  | 97134.04  | 9397.05  | 13876.90 | 4654.88  | 2816.42 | 135.02 | 83.78  | 83.72  | 13.02 | 89.27 | 7.86  | 11.60 | 44.47  | 16.70 | 18.97 | 0.31 | 50.49 |
| ST9  | 71967.39  | 7729.78  | 15298.47 | 4405.98  | 2026.15 | 102.96 | 83.16  | 70.41  | 11.81 | 70.73 | 5.31  | 6.97  | 44.68  | 10.71 | 12.92 | 0.08 | 32.76 |
| ST9  | 61007.19  | 6146.62  | 11591.20 | 3735.21  | 1564.22 | 83.11  | 62.48  | 55.39  | 9.90  | 57.13 | 4.19  | 6.99  | 34.43  | 9.40  | 7.22  | 0.00 | 32.69 |
| M    | 76702.87  | 7757.82  | 13588.86 | 4265.36  | 2135.60 | 107.03 | 76.47  | 69.84  | 11.58 | 72.38 | 5.78  | 8.52  | 41.19  | 12.27 | 13.03 | 0.13 | 38.65 |
| SD   | 18523.12  | 1625.39  | 1870.35  | 475.69   | 633.23  | 26.19  | 12.13  | 14.17  | 1.58  | 16.13 | 1.88  | 2.67  | 5.86   | 3.89  | 5.88  | 0.16 | 10.26 |
| ST10 | 145029.84 | 6006.39  | 40187.19 | 4483.26  | 333.08  | 18.94  | 43.50  | 33.55  | 1.15  | 50.80 | 8.96  | 5.08  | 21.05  | 16.84 | 0.82  | 0.59 | 1.82  |
| ST10 | 137899.34 | 5252.73  | 12935.86 | 3977.23  | 339.88  | 19.08  | 39.20  | 34.23  | 1.16  | 51.25 | 6.54  | 4.98  | 19.68  | 16.24 | 1.17  | 0.56 | 1.78  |
| ST10 | 156656.68 | 4935.98  | 11274.64 | 3627.93  | 402.45  | 20.97  | 35.07  | 34.23  | 1.15  | 60.04 | 8.63  | 5.42  | 17.24  | 20.49 | 0.73  | 0.61 | 2.02  |
| M    | 146528.62 | 5398.36  | 21465.90 | 4029.47  | 358.47  | 19.66  | 39.26  | 34.00  | 1.15  | 54.03 | 8.04  | 5.16  | 19.32  | 17.86 | 0.90  | 0.58 | 1.87  |
| SD   | 9468.06   | 549.86   | 16234.38 | 430.05   | 38.24   | 1.14   | 4.22   | 0.39   | 0.01  | 5.21  | 1.32  | 0.23  | 1.93   | 2.30  | 0.23  | 0.03 | 0.13  |
| ST11 | 62464.66  | 4676.37  | 16511.45 | 1783.15  | 334.83  | 25.42  | 27.41  | 6.45   | 1.15  | 68.83 | 1.89  | 5.44  | 22.14  | 3.97  | 1.10  | 0.00 | 4.21  |
| ST11 | 60141.53  | 4559.73  | 15802.59 | 1808.31  | 288.15  | 26.63  | 24.19  | 5.93   | 1.23  | 71.82 | 1.91  | 4.80  | 20.49  | 3.96  | 1.40  | 0.00 | 4.04  |
| ST11 | 65621.81  | 4983.61  | 16717.57 | 1898.01  | 336.05  | 26.26  | 30.29  | 6.38   | 1.34  | 73.57 | 1.99  | 5.09  | 22.30  | 4.94  | 0.82  | 0.00 | 4.65  |
| M    | 62742.67  | 4739.91  | 16343.87 | 1829.82  | 319.68  | 26.10  | 27.30  | 6.25   | 1.24  | 71.40 | 1.93  | 5.11  | 21.64  | 4.29  | 1.11  | 0.00 | 4.30  |
| SD   | 2750.70   | 218.97   | 479.96   | 60.38    | 27.31   | 0.62   | 3.06   | 0.28   | 0.10  | 2.40  | 0.05  | 0.32  | 1.01   | 0.56  | 0.29  | 0.00 | 0.31  |
| ST12 | 296890.47 | 41357.39 | 43864.30 | 4887.65  | 450.76  | 77.99  | 428.97 | 172.64 | 10.19 | 45.89 | 13.97 | 2.46  | 40.82  | 8.94  | 0.44  | 0.26 | 0.23  |
| ST12 | 323315.17 | 44174.65 | 49223.93 | 5706.97  | 428.88  | 83.50  | 370.69 | 181.88 | 10.81 | 46.70 | 15.32 | 2.34  | 42.03  | 9.82  | 0.46  | 0.25 | 0.21  |
| ST12 | 313043.90 | 38942.15 | 43034.98 | 4772.19  | 374.64  | 77.73  | 392.24 | 166.54 | 10.02 | 44.08 | 13.71 | 2.08  | 36.72  | 8.57  | 0.31  | 0.22 | 0.18  |
| M    | 311083.18 | 41491.40 | 45374.40 | 5122.27  | 418.10  | 79.74  | 397.30 | 173.69 | 10.34 | 45.56 | 14.33 | 2.29  | 39.86  | 9.11  | 0.41  | 0.24 | 0.21  |
| SD   | 13321.02  | 2618.82  | 3359.48  | 509.64   | 39.19   | 3.26   | 29.47  | 7.72   | 0.42  | 1.34  | 0.86  | 0.19  | 2.79   | 0.64  | 0.08  | 0.02 | 0.03  |
| ST13 | 236945.04 | 41369.16 | 64238.30 | 11784.80 | 397.09  | 40.41  | 12.75  | 75.37  | 3.78  | 25.60 | 8.32  | 5.48  | 96.21  | 10.73 | 0.41  | 0.97 | 0.42  |
| ST13 | 251440.81 | 43498.67 | 65356.12 | 11835.92 | 412.39  | 40.23  | 0.00   | 81.10  | 3.30  | 25.26 | 8.71  | 4.45  | 94.98  | 11.09 | 0.27  | 0.98 | 0.49  |
| ST13 | 230455.30 | 41112.74 | 65017.81 | 11830.70 | 391.48  | 41.09  | 1.53   | 76.92  | 3.36  | 25.43 | 10.28 | 10.21 | 89.97  | 9.81  | 0.17  | 1.00 | 0.42  |
| M    | 239613.72 | 41993.52 | 64870.74 | 11817.14 | 400.32  | 40.58  | 4.76   | 77.80  | 3.48  | 25.43 | 9.11  | 6.71  | 93.72  | 10.54 | 0.28  | 0.98 | 0.45  |
| SD   | 10744.27  | 1309.79  | 573.24   | 28.13    | 10.82   | 0.45   | 6.96   | 2.96   | 0.26  | 0.17  | 1.04  | 3.07  | 3.30   | 0.66  | 0.12  | 0.02 | 0.04  |
| ST14 | 147548.74 | 13506.05 | 15703.60 | 8069.07  | 504.06  | 19.21  | 219.59 | 36.88  | 4.32  | 7.23  | 14.40 | 5.63  | 85.91  | 26.70 | 0.24  | 0.25 | 0.74  |
| ST14 | 120320.76 | 11616.30 | 12561.17 | 6917.47  | 432.35  | 15.99  | 255.97 | 30.59  | 3.68  | 5.25  | 11.55 | 4.74  | 75.35  | 22.81 | 0.29  | 0.23 | 0.61  |
| ST14 | 160904.70 | 16157.89 | 17747.69 | 9423.14  | 519.90  | 21.39  | 322.65 | 40.69  | 5.67  | 5.69  | 14.73 | 5.86  | 112.96 | 30.33 | 0.30  | 0.35 | 0.80  |
| M    | 142924.73 | 13760.08 | 15337.49 | 8136.56  | 485.43  | 18.86  | 266.07 | 36.06  | 4.56  | 6.06  | 13.56 | 5.41  | 91.41  | 26.61 | 0.28  | 0.27 | 0.72  |
| SD   | 20683.33  | 2281.43  | 2612.57  | 1254.20  | 46.65   | 2.71   | 52.27  | 5.10   | 1.02  | 1.04  | 1.75  | 0.59  | 19.40  | 3.77  | 0.03  | 0.06 | 0.10  |

| ID        | Na        | Mg       | K        | Ca       | Fe      | Zn    | B    | Mn     | Mo   | Cu     | Ni   | Ba    | Sr     | Cr   | As   | Cd   | Pb   |
|-----------|-----------|----------|----------|----------|---------|-------|------|--------|------|--------|------|-------|--------|------|------|------|------|
| ST15      | 158532.88 | 5915.28  | 23519.04 | 5875.10  | 345.68  | 36.79 | 0.00 | 11.38  | 1.29 | 13.57  | 2.46 | 6.45  | 46.68  | 0.91 | 0.33 | 0.15 | 0.93 |
| ST15      | 236144.55 | 8273.06  | 33551.25 | 8517.10  | 455.24  | 45.65 | 0.00 | 16.00  | 1.62 | 17.86  | 3.21 | 8.31  | 66.24  | 1.24 | 0.31 | 0.19 | 1.14 |
| ST15      | 187222.10 | 7143.53  | 29740.10 | 7399.54  | 401.54  | 42.08 | 0.00 | 14.09  | 1.46 | 15.94  | 3.00 | 7.17  | 58.39  | 1.13 | 0.29 | 0.15 | 0.96 |
| <b>M</b>  | 193966.51 | 7110.62  | 28936.80 | 7263.91  | 400.82  | 41.50 | 0.00 | 13.82  | 1.46 | 15.79  | 2.89 | 7.31  | 57.10  | 1.10 | 0.31 | 0.16 | 1.01 |
| <b>SD</b> | 39242.94  | 1179.23  | 5064.12  | 1326.21  | 54.78   | 4.46  | 0.00 | 2.32   | 0.17 | 2.15   | 0.39 | 0.94  | 9.85   | 0.17 | 0.02 | 0.02 | 0.11 |
| ST16      | 146137.72 | 22176.45 | 17352.68 | 22952.96 | 909.47  | 35.43 | 0.00 | 88.94  | 2.88 | 13.17  | 1.80 | 15.51 | 152.80 | 2.20 | 0.64 | 0.48 | 3.44 |
| ST16      | 117023.84 | 19546.51 | 13928.27 | 25369.06 | 978.83  | 35.24 | 0.00 | 96.95  | 2.25 | 182.33 | 2.17 | 13.95 | 137.55 | 2.60 | 0.65 | 0.44 | 3.46 |
| ST16      | 129628.76 | 22053.01 | 14518.76 | 29768.51 | 1126.47 | 33.61 | 0.00 | 106.94 | 2.38 | 16.30  | 2.14 | 16.50 | 150.19 | 2.84 | 0.76 | 0.46 | 3.48 |
| <b>M</b>  | 130930.10 | 21258.66 | 15266.57 | 26030.18 | 1004.92 | 34.76 | 0.00 | 97.61  | 2.50 | 70.60  | 2.04 | 15.32 | 146.85 | 2.54 | 0.68 | 0.46 | 3.46 |
| <b>SD</b> | 14600.50  | 1484.05  | 1830.59  | 3455.54  | 110.83  | 1.00  | 0.00 | 9.02   | 0.33 | 96.77  | 0.21 | 1.29  | 8.15   | 0.32 | 0.06 | 0.02 | 0.02 |
| ST17      | 176441.08 | 10857.19 | 22454.00 | 7313.85  | 145.53  | 14.25 | 0.00 | 25.62  | 2.08 | 6.39   | 1.76 | 2.11  | 56.97  | 2.32 | 0.11 | 0.07 | 0.25 |
| ST17      | 202046.32 | 11054.41 | 21478.14 | 6928.59  | 138.69  | 21.70 | 0.00 | 27.67  | 1.91 | 6.23   | 0.82 | 1.94  | 52.94  | 0.33 | 0.16 | 0.06 | 0.22 |
| ST17      | 162106.72 | 9445.76  | 20107.88 | 6491.58  | 117.51  | 15.07 | 0.00 | 22.63  | 1.63 | 5.61   | 0.70 | 1.62  | 48.09  | 0.32 | 0.12 | 0.06 | 0.23 |
| <b>M</b>  | 180198.04 | 10452.45 | 21346.67 | 6911.34  | 133.91  | 17.01 | 0.00 | 25.30  | 1.87 | 6.08   | 1.10 | 1.89  | 52.67  | 0.99 | 0.13 | 0.06 | 0.23 |
| <b>SD</b> | 20233.12  | 877.38   | 1178.57  | 411.40   | 14.61   | 4.08  | 0.00 | 2.53   | 0.22 | 0.41   | 0.58 | 0.25  | 4.45   | 1.15 | 0.03 | 0.00 | 0.02 |

**Table S3.** ICP-MS (ppm) of succulent stems of *A. meridionale* (triplicates). Symbology: M (mean) and SD (Standard deviation). Samples nomenclature referred in Table S1.

| ID        | Na        | Mg       | K        | Ca       | Fe      | Zn    | B    | Mn    | Mo   | Cu    | Ni    | Ba    | Sr     | Cr    | As   | Cd   | Pb   |
|-----------|-----------|----------|----------|----------|---------|-------|------|-------|------|-------|-------|-------|--------|-------|------|------|------|
| ST18      | 91870.29  | 18609.34 | 11060.23 | 22526.94 | 1774.68 | 17.65 | 0.00 | 80.88 | 3.33 | 4.54  | 15.73 | 22.02 | 384.70 | 33.32 | 0.66 | 0.68 | 1.15 |
| ST18      | 95514.15  | 21372.31 | 13782.56 | 26671.38 | 1867.40 | 19.86 | 0.00 | 92.31 | 3.80 | 5.54  | 14.70 | 19.61 | 461.71 | 31.60 | 0.62 | 0.73 | 1.16 |
| ST18      | 100353.43 | 21682.79 | 14972.16 | 27024.30 | 1857.93 | 19.79 | 0.00 | 95.34 | 4.10 | 5.53  | 15.93 | 19.99 | 468.71 | 34.79 | 0.63 | 0.70 | 1.20 |
| <b>M</b>  | 95912.62  | 20554.81 | 13271.65 | 25407.54 | 1833.34 | 19.10 | 0.00 | 89.51 | 3.75 | 5.20  | 15.46 | 20.54 | 438.38 | 33.24 | 0.63 | 0.70 | 1.17 |
| <b>SD</b> | 4255.59   | 1691.97  | 2005.38  | 2500.91  | 51.02   | 1.25  | 0.00 | 7.63  | 0.39 | 0.58  | 0.66  | 1.30  | 46.61  | 1.59  | 0.02 | 0.03 | 0.03 |
| ST19      | 49147.93  | 21158.18 | 5147.32  | 11509.97 | 542.98  | 62.81 | 0.00 | 35.37 | 1.56 | 10.71 | 8.25  | 10.84 | 164.44 | 15.51 | 0.34 | 0.89 | 0.98 |
| ST19      | 43019.97  | 18216.90 | 4200.22  | 9835.58  | 464.10  | 51.96 | 0.00 | 30.05 | 0.95 | 8.85  | 6.88  | 10.17 | 134.06 | 13.47 | 0.30 | 0.78 | 0.88 |
| ST19      | 55658.49  | 25418.71 | 5570.38  | 13940.68 | 623.26  | 69.47 | 0.00 | 41.69 | 1.32 | 12.10 | 9.42  | 12.73 | 187.95 | 18.69 | 0.39 | 1.03 | 1.16 |
| <b>M</b>  | 49275.46  | 21597.93 | 4972.64  | 11762.08 | 543.45  | 61.41 | 0.00 | 35.70 | 1.28 | 10.55 | 8.19  | 11.25 | 162.15 | 15.89 | 0.35 | 0.90 | 1.01 |
| <b>SD</b> | 6320.22   | 3620.99  | 701.58   | 2064.13  | 79.58   | 8.84  | 0.00 | 5.83  | 0.30 | 1.63  | 1.27  | 1.33  | 27.02  | 2.63  | 0.05 | 0.13 | 0.14 |
| ST20      | 183799.33 | 11178.88 | 32058.68 | 9000.00  | 211.52  | 38.85 | 0.00 | 12.34 | 3.36 | 3.97  | 4.02  | 2.42  | 55.70  | 5.00  | 0.22 | 0.11 | 0.23 |
| ST20      | 235235.97 | 14178.63 | 40843.19 | 11779.38 | 267.29  | 48.52 | 0.00 | 15.68 | 4.24 | 5.08  | 5.32  | 3.31  | 72.49  | 6.34  | 0.25 | 0.13 | 0.35 |
| ST20      | 237456.82 | 13929.85 | 37923.72 | 11538.06 | 265.00  | 46.37 | 0.00 | 15.62 | 3.98 | 4.74  | 5.62  | 3.05  | 70.48  | 6.44  | 0.27 | 0.13 | 0.35 |
| <b>M</b>  | 218830.71 | 13095.79 | 36941.86 | 10772.48 | 247.93  | 44.58 | 0.00 | 14.55 | 3.86 | 4.60  | 4.99  | 2.93  | 66.22  | 5.93  | 0.25 | 0.12 | 0.31 |
| <b>SD</b> | 30358.38  | 1664.74  | 4473.81  | 1539.75  | 31.56   | 5.08  | 0.00 | 1.91  | 0.45 | 0.57  | 0.85  | 0.46  | 9.17   | 0.80  | 0.03 | 0.01 | 0.07 |
